# Supplementary material
Source: publisher figshare collection journal article supplement (https://sage.figshare.com/ndownloader/files/24163570)
Supplement: Supplementary file 1 [file 24163570]

## CLINICALTRIALS.GOV JHU RECORD REVIEW

|                                                                                                                                                                                                                                                                                                                                                                                                                                                                                                                                                                                                                                                                                                                                                                                                                                                               |                      |                   |                                                                                                                                                       |                                                                       |
|---------------------------------------------------------------------------------------------------------------------------------------------------------------------------------------------------------------------------------------------------------------------------------------------------------------------------------------------------------------------------------------------------------------------------------------------------------------------------------------------------------------------------------------------------------------------------------------------------------------------------------------------------------------------------------------------------------------------------------------------------------------------------------------------------------------------------------------------------------------|----------------------|-------------------|-------------------------------------------------------------------------------------------------------------------------------------------------------|-----------------------------------------------------------------------|
| <b>PROTOCOL ID</b>                                                                                                                                                                                                                                                                                                                                                                                                                                                                                                                                                                                                                                                                                                                                                                                                                                            | <b>RECORD OWNER</b>  | <b>REVIEWER</b>   | <input type="checkbox"/> Registration<br><input type="checkbox"/> Update status<br><input type="checkbox"/> Results<br><i>(add Results checklist)</i> | <input type="checkbox"/> pACT/ACT<br><input type="checkbox"/> Non-ACT |
| <b>NCT#</b>                                                                                                                                                                                                                                                                                                                                                                                                                                                                                                                                                                                                                                                                                                                                                                                                                                                   |                      |                   |                                                                                                                                                       |                                                                       |
| <b>DATE RELEASED</b>                                                                                                                                                                                                                                                                                                                                                                                                                                                                                                                                                                                                                                                                                                                                                                                                                                          | <b>COMMENTS DATE</b> | <b>REPLY DATE</b> | <b>DATE PUBLISHED</b>                                                                                                                                 |                                                                       |
| <b>GENERAL REVIEW ITEMS</b>                                                                                                                                                                                                                                                                                                                                                                                                                                                                                                                                                                                                                                                                                                                                                                                                                                   |                      |                   | <b>NOTES</b>                                                                                                                                          |                                                                       |
| <input type="checkbox"/> No monetary value (e.g. compensation, food voucher) entered anywhere in the protocol<br><input type="checkbox"/> Record Owner is the PI (JHU Policy)<br><input type="checkbox"/> PI on record matches IRB PI: _____<br><input type="checkbox"/> Contact info for Record Owner is up-to-date<br><input type="checkbox"/> NCT number included in IRB "Clinical Trials Information" section (if applicable)<br><input type="checkbox"/> All Warnings (if needed)<br><input type="checkbox"/> All parenthetical citations have been removed<br><input type="checkbox"/> All acronyms have been expanded on their first use<br><input type="checkbox"/> Spell-check complete<br><input type="checkbox"/> Free-text fields are blank if there is no information to report, and do not contain text such as "TBD," "Pending," "N/A," "None" |                      |                   |                                                                                                                                                       |                                                                       |
| <b>PROTOCOL SECTION</b>                                                                                                                                                                                                                                                                                                                                                                                                                                                                                                                                                                                                                                                                                                                                                                                                                                       |                      |                   |                                                                                                                                                       |                                                                       |
| <b>STUDY IDENTIFICATION</b><br><input type="checkbox"/> Unique protocol ID is the IRB number (JHU Policy)<br><input type="checkbox"/> Brief Title does not include study type (e.g., Phase I, Randomized...)<br><input type="checkbox"/> Official title should match what is in the IRB (or grant application if applicable)<br><input type="checkbox"/> Secondary IDs include NIH grant numbers (verify in IRB)                                                                                                                                                                                                                                                                                                                                                                                                                                              |                      |                   |                                                                                                                                                       |                                                                       |
| <b>STUDY STATUS</b><br><input type="checkbox"/> Record Verification Date is the current month/year<br><input type="checkbox"/> Overall Status matches IRB/CRMS<br><input type="checkbox"/> Study start date verified with CRMS enrollment date<br><input type="checkbox"/> Completion Dates Actual/Anticipated have been evaluated for accuracy<br><input type="checkbox"/> If timeframes for outcomes are the same the primary and study completion dates are identical                                                                                                                                                                                                                                                                                                                                                                                      |                      |                   |                                                                                                                                                       |                                                                       |
| <b>SPONSOR/COLLABORATORS</b><br><input type="checkbox"/> Responsible Party: Sponsor (JHU Policy)<br><input type="checkbox"/> All sources of support identified in IRB "Support Information" section included as Collaborators<br><input type="checkbox"/> Full Name used and if not recognized, "Recognize" is selected                                                                                                                                                                                                                                                                                                                                                                                                                                                                                                                                       |                      |                   |                                                                                                                                                       |                                                                       |
| <b>OVERSIGHT</b><br><input type="checkbox"/> IND/IDE information completed (if applicable)<br><input type="checkbox"/> Pending is not entered for IND/IDE number (if applicable)                                                                                                                                                                                                                                                                                                                                                                                                                                                                                                                                                                                                                                                                              |                      |                   |                                                                                                                                                       |                                                                       |
| <b>Verify Human Subjects Review</b><br><input type="checkbox"/> Board Status verified<br><input type="checkbox"/> Approval Number is a valid IRB number<br><input type="checkbox"/> Board Name: Johns Hopkins Medicine Institutional Review Board<br><input type="checkbox"/> Board Affiliation: Johns Hopkins Medicine<br><input type="checkbox"/> Phone: (410) 955-3008, Email: <a href="mailto:jhmeirb@jhmi.edu">jhmeirb@jhmi.edu</a><br><input type="checkbox"/> Address: 1620 McElderry Street, Reed Hall Suite B130, Baltimore, MD, 21205                                                                                                                                                                                                                                                                                                               |                      |                   |                                                                                                                                                       |                                                                       |

**STUDY DESCRIPTION**

- ☐ Brief Summary does not unnecessarily duplicate information provided for other data elements
- ☐ Brief Summary clearly states the study's hypothesis or the purpose (for interventional and observational)
- ☐ Brief Summary and Detailed Description are written in complete sentences with no formatting errors
- ☐ Record does not use personal pronouns: "I, my, we, our, us" – becomes "the investigator(s)"; "you, your, they, them, their" – becomes "the participant(s)"

**CONDITIONS**

- ☐ Conditions/Focus of study are discrete and does not use verbs or complete sentences
- ☐ Keywords are not numbered or bulleted, each condition and keyword is listed individually, one per line

**STUDY DESIGN**

- ☐ All required fields are completed
- ☐ Verify Study Design based on protocol in IRB
- ☐ "Allocation" marked as "N/A" for single-arm interventional studies
- ☐ Enrollment number Actual/Anticipated verified

**ARMS/INTERVENTIONS**

- ☐ Arm Title or Group/Cohort Label is brief and informative (even if there is only 1 arm)
- ☐ Interventions and intervention descriptions are entered correctly (drug or device names should be added to title and description)
- ☐ Arms/interventions are cross-referenced appropriately

**OUTCOME MEASURES**

- ☐ Title is "outcome neutral", specific and states WHAT is being measured, only 1 variable must be assessed per outcome measure (unless it is a composite)
- ☐ Description explains WHAT is being measured, not WHY it is being measured
- ☐ Scoring scale name, score range, significance of upper and lower limits specified (if applicable)
- ☐ Unit of measure specified
- ☐ Time frame specified as a single time point or change between 2 time points (if unsure of duration, add up to the duration team is willing to follow each participant for that outcome measure e.g. "up to 1 year")
- ☐ Time points should be written in full e.g. 5 hours not 5hrs, 60 minutes not 60mins, 2 years not 2yrs
- ☐ Time frame should not be the whole duration of study if outcome measure specifies a duration for the assessment of that measure which is less than whole duration of study

INCORRECT: "Safety and Toxicity", Description: "Safety of study drug."

CORRECT: "Safety as assessed by number of participants experiencing adverse events" Description: "Number of participants experiencing adverse events grade 3 or higher, as defined by Common Terminology Criteria for Adverse Events version 5.0 (CTCAE v5.0)"

**ELIGIBILITY**

- ☐ Age Limits are consistent with the Eligibility Criteria and with other parts of the record
- ☐ Eligibility criteria is divided into Inclusion/Exclusion criteria in bulleted format

**CONTACTS/LOCATIONS**

- ☐ Central Contact Person specified and accurate (JHU Policy)
- ☐ Study Officials match IRB
- ☐ All study sites specified matches CRMS
- ☐ Recruiting status for each study site accurate (if at least one study site is recruiting then Study Status reflects "Recruiting")
- ☐ Each facility is listed in a separate field

**IPD Sharing Statement**

- ☐ The Plan to Share IPD is 'YES' or 'NO' (ICMJE does not accept 'UNDECIDED') if an option is selected.

**REFERENCES**

- ☐ Each citation is listed in a separate field (if applicable)

## RESULTS SECTION

### PARTICIPANT FLOW

- ☐ Protocol Enrollment refers to total number of subjects who consented to protocol (including withdrawals after consent but not screen failures)
- ☐ Recruitment details (optional) explains any specifics used at time of recruitment
- ☐ Pre-assignment details explains (in detail) what happened to subjects who signed consent but were not assigned to an arm/intervention (e.g. withdrawals)
- ☐ Arms titles and arm descriptions specified consistent with protocol section
- ☐ Number of Participants Started refers to total number of participants assigned to each arm
- ☐ Number of Participants Completed refers to total number of participants who completed study intervention
- ☐ Reason(s) for Not Completed provided (optional)
- ☐ Divided into periods/milestones appropriately (if applicable)
- ☐ Total number of participants started cannot be greater than enrollment number
- ☐ Total number completed is equal to or less than "started"

### BASELINE CHARACTERISTICS

- ☐ Overall Number of Baseline Participants should match Number of participants Started (from Participant Flow)
- ☐ Baseline Analysis Population Description explains if there is a discrepancy between Overall & Started numbers
- ☐ Arm titles/descriptions are consistent with participant flow and/or protocol section
- ☐ Data is presented per arm or all participants together for crossover design
- ☐ If "number of participants" is reported, make sure Measure Type is "Count of Participants"
- ☐ Baseline Measure Description is specified for all Study-specific measures

### OUTCOME MEASURES

- ☐ Titles/descriptions/time frame meet the criteria (as specified on prior checklist)
- ☐ Results are reported per arm or by intervention for crossover design
- ☐ Analysis Population Description includes reason why Number of Participants analyzed is different than total number of participants that started or completed study from participant flow (if applicable)
- ☐ Type and Number of Units analyzed is indicated, if other than "number of participants" (e.g. Lesions)
- ☐ Unit of measure matches what is stated in Outcome Title/Description
- ☐ Sum of all results entered for each arm equals overall number of participants analyzed (if applicable)
- ☐ Verify true data is entered and there are no placeholders
- ☐ Time frame specified not more than duration of the study
- ☐ Statistical Analysis portion is optional (if entered, review for accuracy)

### ADVERSE EVENTS

- ☐ Time frame specified
- ☐ Collection Approach specified
- ☐ Arm titles/descriptions consistent with other sections in the record
- ☐ Data presented per arm
- ☐ All-cause mortality specified (cross-check with number "not completed due to death" from participant flow and any mortality measures in outcome section, if applicable)
- ☐ Total Number "At Risk" must be equal to total number of participants who started the study

### LIMITATIONS AND CAVEATS

- ☐ Information here is only about limitations, unvalidated data or any reason why data entered cannot be totally reliable and does not contain any discussion of results or any other information.

### CERTAIN AGREEMENTS

- ☐ Principal Investigators are employed by the organization sponsoring the study

### RESULTS POINT OF CONTACT

- ☐ Information is correct and valid email address/phone number entered

**DOCUMENT SECTION**

- ☐ Protocol (required for primary completion date on or after January 18, 2017)
- ☐ Statistical Plan (required for primary completion date on or after January 18, 2017)
- ☐ Informed Consent Form (required for studies approved on or after January 21, 2019)
- ☐ Cover Page
  - ☐ NCT Number
  - ☐ Study Title
  - ☐ PI Name (JHU-specific)
  - ☐ Date of Document (date document most recently updated or IRB approved, whichever is more recent)
- ☐ Additional Documents: \_\_\_\_\_
- ☐ Uploaded document(s) do not include a publication

**REFERENCES**

- ☐ Links to results verified as active (if applicable)

**Acronyms**

JHU – Johns Hopkins University

pACT – Probable Applicable Clinical Trial

ACT – Applicable Clinical Trial

PI – Principal Investigator

IRB – Institutional Review Board

NCT – National Clinical Trial

NIH – National Institutes of Health

CRMS – Clinical Research Management System

IND – Investigational New Drug

IDE – Investigational Device Exemption

ICMJE – International Committee of Medical Journal Editors
